# Supplementary material for: Antiretroviral Therapy for Prevention of Tuberculosis in Adults with HIV: A Systematic Review and Meta-Analysis
Source: PLoS Med. 2012 Jul 24;9(7):e1001270. doi: 10.1371/journal.pmed.1001270 (PMC3404110; doi:10.1371/journal.pmed.1001270)
Supplement: Table S2 — HIV-associated tuberculosis cases in developed countries [3],[28]. (PDF) [file pmed.1001270.s003.pdf]

**Table S2.** HIV-associated tuberculosis cases in developed countries [3, 27]. – indicates no estimate

| Country                                      | HIV-TB cases | Human Development Index |
|----------------------------------------------|--------------|-------------------------|
| Norway                                       | < 10         | 0.938                   |
| Australia                                    | 52           | 0.937                   |
| New Zealand                                  | < 10         | 0.907                   |
| United States                                | 1100         | 0.902                   |
| Ireland                                      | 16           | 0.895                   |
| Liechtenstein                                | -            | 0.891                   |
| Netherlands                                  | 52           | 0.890                   |
| Canada                                       | 140          | 0.888                   |
| Germany                                      | 97           | 0.885                   |
| Sweden                                       | 16           | 0.885                   |
| Japan                                        | 100          | 0.884                   |
| Korea, Republic of                           | 330          | 0.877                   |
| Switzerland                                  | 36           | 0.874                   |
| France                                       | 360          | 0.872                   |
| Israel                                       | 18           | 0.872                   |
| Finland                                      | < 10         | 0.871                   |
| Iceland                                      | < 10         | 0.869                   |
| Belgium                                      | 55           | 0.867                   |
| Denmark                                      | 15           | 0.866                   |
| Spain                                        | 950          | 0.863                   |
| Hong Kong, China (SAR)                       | 42           | 0.862                   |
| Greece                                       | 12           | 0.855                   |
| Italy                                        | 180          | 0.854                   |
| Luxembourg                                   | < 10         | 0.852                   |
| Austria                                      | 21           | 0.851                   |
| United Kingdom                               | 310          | 0.849                   |
| Singapore                                    | 81           | 0.846                   |
| Czech Republic                               | < 10         | 0.841                   |
| Slovenia                                     | -            | 0.828                   |
| Andorra                                      | -            | 0.824                   |
| Slovakia                                     | < 10         | 0.818                   |
| Malta                                        | < 10         | 0.815                   |
| United Arab Emirates                         | < 10         | 0.815                   |
| Estonia                                      | 350          | 0.812                   |
| Cyprus                                       | 61           | 0.810                   |
| Brunei Darussalam                            | < 10         | 0.805                   |
| Hungary                                      | 15           | 0.805                   |
| Qatar                                        | -            | 0.803                   |
| Bahrain                                      | 11           | 0.801                   |
| Poland                                       | 190          | 0.795                   |
| Portugal                                     | 690          | 0.795                   |
| Barbados                                     | < 10         | 0.788                   |
| <b>Total reported in developed countries</b> | 5410         |                         |
| <b>Global</b>                                | 1100000      |                         |
